# Supplementary material for: Hypertension and Postoperative Pain: A Prospective Observational Study
Source: Pain Res Manag. 2019 Jan 9;2019:8946195. doi: 10.1155/2019/8946195 (PMC6343159; doi:10.1155/2019/8946195)
Supplement: (Supplementary Materials) — Hypertension_pain.csv is our raw data that can be assessed for public. [file 8946195.f1.csv]

number	Rigement	visit_day	sex	age	weight	height	past_hx	V12	V13	V14	V15	V16	ASA	SBP	DBP	surgical_dep	Group	surgical_name	surgical_day	surgical_duration	HOSPITALSTAY	PCA_satisfication	Morbidity	Mortality	Total_blood_loss	Total_blood_in	Total_volume	Urine_output	PreOpSBP	PreOpDBP	PreOp_body_tem	PreOp_HR_min	PreOpPaO2	PreOpPaCO2	PreOpSaO2	PostOP2hrSBP	PostOP2hrDBP	PostOP2hr_BT	PostOP2hr_HR_min	PostOP2hrPaO2	PostOP2hrPaCO2	PostOP2hrSaO2	PostOPDay1SBP	PostOPDay1DBP	PostOPDay1_BT	PostOPDay1_HRmin	PostOPDay1PaO2	PostOPDay1PaCO2	PostOPDay1SaO2
104-123	4		1	61	49.4	155.5	0	0	0	0	0	6	3	109	70		1		42283	12.25	20.0	9.5	0.0	0.0	8200	1350	2000	470	109.0	70.0	35.8	57.0	300.8	44.6	99.0	121.0	57.0	36.4	70.0	85.7	33.1	97	115.0	72.0	36.8	97.0	**	**	92
103-090	4		1	50	87.2	179	1	1	1	1	1	0	2	137	83		2		42220	5.15	62	9	0	0	50	0	2600	150	137	83	36.200000000000003	86	239.59999999999999	40.600000000000001	100	120	71	37.5	97	211.19999999999999	36.399999999999999	100	115	85	37.100000000000001	121	**	**	**
103-129	4		2	49	62.6	149.3	1	0	0	0	0	0	2	102	89		2		41946	6	17	8	0	0	150	0	3000	1900	102	89	35.700000000000003	86	212.80000000000001	31.699999999999999	98	150	93	36.799999999999997	98	178.80000000000001	36.399999999999999	100	133	91	35.899999999999999	99	**	**	**
104-045	4		2	38	35.4	160	0	0	0	0	0	0	2	118	49		1		42108	10.5	7.0	7.5	0.0	0.0	4400	600	0	1150	118.0	49.0	34.4	104.0	361	36	100.0	99.0	39.0	35.4	101.0	**	**	100	102.0	56.0	37.2	102.0	**	**	97
103-020	4		1	44	83.5	179.4	0	0	1	1	1	1	2	137	65		2		41703	4.25	10	10	0	0	650	0	2650	200	137	65	36	90	**	**	100	121	72	36.5	84	**	**	100	119	63	36.700000000000003	78	**	**	96
104-068	4		1	60	81.1	174	1	0	1	1	1	0	3	130	83		2		42170	7.75	20.0	9	0.0	0.0	4300	200	0	600	130.0	83.0	35.6	122.0	242.3	35.4	100.0	138.0	74.0	37	88.0	**	**	99	125.0	74.0	36.5	101.0	**	**	**
103-010	4		2	66	75.2	157	1	0	0	0	0	1	3	114	72		3		41688	6.75	10	9	0	0	1600	1000	3500	300	114	72	36.5	109	228.19999999999999	32.299999999999997	100	132	87	36.299999999999997	109	90.799999999999997	35.399999999999999	100	118	80	36.799999999999997	111	**	**	94
104-096	4		2	60	48.3	149.6	0	0	0	0	0	0	2	165	64		2		42219	6	20.0	9	0.0	0.0	3000	500	0	850	165.0	64.0	36.1	72.0	290	43.7	100.0	111.0	43.0	37.7	75.0	**	**	95	100.0	49.0	38.0	84.0	**	**	**
104-097	4		2	56	54.5	145	0	0	0	0	0	0	2	149	102		1		42219	13.25	13.0	9	0.0	0.0	6200	1800	3000	1000	149.0	102.0	35.9	77.0	266.6	38.4	100.0	118.0	73.0	35.2	104.0	148.9	39.2	99	121.0	59.0	37.5	108.0	**	**	92
104-143	4		2	72	82.8	148	1	0	0	0	0	1	3	148	60		3		42338	4.6	6.0	7.5	0.0	0.0	2300	50	0	100	148.0	60.0	36.2	71.0	**	**	99.0	154.0	71.0	35.4	87.0	**	**	96	111.0	49.0	37.8	95.0	**	**	95
103-115	4		1	40	97.1	163.5	0	0	1	1	1	1	2	153	83		2		41911	12	45	9	0	0	250	0	6250	1800	153	83	36	107	175.40000000000001	31.100000000000001	99	128	65	36.600000000000001	114	**	**	99	128	63	37.299999999999997	104	**	**	93
103-098	4		2	71	67.5	153	1	1	0	0	0	1	2	169	71		3		41869	4.25	27	8	0	0	50	0	1850	150	169	71	35.799999999999997	86	**	**	100	194	83	36.299999999999997	97	**	**	100	179	86	36.600000000000001	105	**	**	100
103-099	4		2	30	46.8	151	0	0	0	0	0	0	2	147	87		2		41869	6.75	12	10	0	0	200	0	3500	300	147	87	36	114	**	**	100	127	89	37.399999999999999	98	**	**	100	138	91	38	112	**	**	**
103-113	4		2	68	52.9	157.9	1	0	1	0	0	0	2	138	88		3		41904	4.25	12	10	0	0	30	0	1600	200	138	88	35.5	76	**	**	100	163	82	35	73	**	**	100	114	68	36.899999999999999	71	**	**	**
104-022	4		2	61	50.8	162	0	0	0	0	0	0	1	135	83		2		42074	2.5	10.0	7.5	0.0	0.0	1600	50	0	100	135.0	83.0	36.7	77.0	**	**	100.0	131.0	72.0	36	85.0	**	**	100	137.0	65.0	37.4	78.0	**	**	**
104-041	4		2	59	65.3	164	1	1	0	1	0	0	3	134	70		3		42102	4.75	14.0	9	0.0	0.0	2750	900	0	650	134.0	70.0	35.8	86.0	241.4	38.6	97.0	123.0	73.0	36.9	92.0	83.6	36	98	131.0	68.0	37.0	105.0	**	**	95
104-043	4		2	60	50.2	155	0	0	0	0	0	0	3	155	80		2		42107	3.25	8.0	5.5	0.0	0.0	1150	70	500	100	155.0	80.0	35.5	85.0	237.9	35.2	98.0	143.0	60.0	36.1	103.0	**	**	98	132.0	54.0	37.0	98.0	**	**	99
103-048	4		1	46	73	166.6	0	0	0	0	0	0	1	134	53		2		41764	5	16	2	0	0	150	0	2450	200	134	53	35.5	107	**	**	100	117	71	37.5	88	**	**	100	138	76	37.399999999999999	68	**	**	**
103-082	4		1	62	102	165	0	0	1	1	1	1	2	198	106		2		41821	3.5	8	9	0	0	10	0	1500	550	198	106	36	59	**	**	100	123	86	35	80	**	**	100	149	86	36.799999999999997	67	**	**	**
104-105	4		2	49	61.3	160.3	0	0	0	0	0	0	2	120	75		2		42227	15.75	8.0	10	0.0	0.0	6300	600	500	2100	120.0	75.0	35.4	57.0	323.5	31.5	100.0	99.0	50.0	36.6	74.0	225.2	37.2	100	94.0	51.0	36.5	80.0	**	**	**
103-133	4		1	59	63.7	162	1	0	0	0	0	0	2	135	94		2		41953	4.5	13	9	0	0	30	0	2500	200	135	94	37.100000000000001	101	**	**	100	136	68	37	75	**	**	100	153	98	37.100000000000001	72	**	**	**
104-020	4		1	56	81.9	172	1	1	1	1	0	1	2	167	93		3		42073	7	16.0	(拒答)	0.0	0.0	3900	1200	500	1200	167.0	93.0	34.8	71.0	207.4	31.1	97.0	140.0	78.0	34.7	82.0	125.5	33.4	97	108.0	77.0	37.3	81.0	**	**	99
104-037	4		1	56	65.4	158.5	0	0	1	1	0	0	2	188	87		2		42101	3	10.0	10	0.0	0.0	1200	50	0	300	188.0	87.0	36.1	72.0	**	**	100.0	150.0	82.0	36	72.0	**	**	100	145.0	86.0	37.2	73.0	**	**	**
104-085	4		1	70	62.8	167	0	0	0	0	0	0	3	126	68		2		42205	5.25	10.0	8	0.0	0.0	1800	100	0	700	126.0	68.0	36.9	62.0	**	**	100.0	143.0	68.0	37	71.0	**	**	97	153.0	83.0	37.5	86.0	**	**	**
103-025	4		2	61	65	156	0	0	0	0	0	0	2	157	75		2		41708	7	17	9	0	0	300	0	2600	600	157	75	36.600000000000001	107	157.19999999999999	33.5	100	160	86	38.799999999999997	96	85.200000000000003	35	100	160	82	37.100000000000001	88	**	**	**
103-026	4		2	54	61.9	158.3	0	0	0	0	0	0	2	99	64		1		41708	7.5	25	10	0	0	500	500	3500	1450	99	64	36.200000000000003	80	227.30000000000001	31	100	120	65	37	87	201.69999999999999	37.700000000000003	99	99	45	37.299999999999997	62	**	**	**
103-067	4		2	67	65.8	158	0	0	0	0	0	1	2	155	97		2		41786	2.5	41	10	0	0	50	0	1300	70	155	97	35.899999999999999	62	**	**	100	149	87	36.100000000000001	75	**	**	100	126	86	36.799999999999997	85	**	**	93
103-068	4		2	68	45	149.3	0	0	0	0	0	1	2	152	82		2		41786	4.5	9	9	0	0	50	0	2450	700	152	82	36.299999999999997	87	260.89999999999998	34.899999999999999	100	130	63	36.5	81	80.200000000000003	40.399999999999999	100	135	80	37.100000000000001	75	**	**	**
104-046	4		2	64	53.3	142	0	0	0	0	0	0	1	102	64		1		42108	1.55	5.0	8	0.0	0.0	900	5	0	200	102.0	64.0	36.0	73.0	**	**	100.0	102.0	52.0	36	62.0	**	**	99	123.0	70.0	37.1	66.0	**	**	**
104-116	4		2	52	56.3	159	0	0	0	0	0	1	2	114	65		1		42262	4.5	10.0	10	0.0	0.0	1900	50	0	400	114.0	65.0	35.7	82.0	**	**	100.0	100.0	71.0	37.2	90.0	**	**	97	95.0	66.0	38.6	90.0	**	**	94
104-144	4		2	57	85	164.5	1	1	0	0	0	0	3	145	83		3		13668825600	9	27.0	10.0	0.0	0.0	5650	600	2000	700	145.0	83.0	35.0	109.0	151.1	42.2	100.0	107.0	66.0	36.5	107.0	156	30	100.0	90.0	55.0	37.4	116.0	**	**	98
104-146	4		2	65	52.1	144	0	0	0	0	0	1	2	121	66		1		13668998400	2.75	7.0	10.0	0.0	0.0	1950	300	0	50	121.0	66.0	35.4	72.0	**	**	100.0	120.0	71.0	36.2	71.0	**	**	97.0	106.0	56.0	36.8	67.0	**	**	100
104-147	4		2	62	76	160	1	0	0	0	0	0	2	139	73		3		13668998400	3.25	7.0	8.0	0.0	0.0	1300	10	0	150	139.0	73.0	35.3	93.0	241.1	42.3	100.0	153.0	78.0	36.0	69.0	**	**	100.0	128.0	74.0	36.0	68.0	**	**	100
103-011	4		1	31	72.5	174	0	0	0	0	0	0	2	131	88		2		41688	6.25	7	9	0	0	100	0	2500	400	131	88	35.799999999999997	93	180.19999999999999	32.200000000000003	99.900000000000006	161	99	38.100000000000001	120	180	32	100	151	89	37.200000000000003	128	**	**	**
104-038	4		1	52	81.5	170.7	0	0	0	0	0	0	1	140	86		2		42101	3	8.0	8	0.0	0.0	1500	150	0	150	140.0	86.0	36.2	71.0	**	**	100.0	142.0	83.0	36.4	91.0	**	**	100	139.0	87.0	36.2	86.0	**	**	96
104-061	4		1	64	69.9	169	1	0	0	0	0	1	2	178	97		3		42136	2	12.0	9	0.0	0.0	1150	20	0	100	178.0	97.0	35.9	60.0	**	**	100.0	165.0	83.0	36	72.0	**	**	98	177.0	99.0	36.4	80.0	**	**	**
104-070	4		1	24	79.9	166	0	0	0	0	0	0	1	137	52		1		42170	5	6.0	9	0.0	0.0	6200	2100	1000	200	137.0	52.0	35.4	95.0	**	**	100.0	111.0	51.0	37.2	103.0	**	**	100	114.0	59.0	37.5	108.0	**	**	99
104-106	4		1	55	59.5	161.4	0	0	0	0	0	1	2	124	80		2		42241	3.75	25.0	9	0.0	0.0	1800	200	0	300	124.0	80.0	35.3	83.0	**	**	100.0	134.0	78.0	36	93.0	**	**	98	130.0	75.0	36.8	99.0	**	**	**
104-122	4		1	59	77.3	171	0	0	0	1	0	0	2	141	84		2		42282	4.1	7.0	8	0.0	0.0	1500	80	0	200	141.0	84.0	35.7	61.0	**	**	98.0	139.0	85.0	36.4	80.0	**	**	98	150.0	90.0	36.9	79.0	**	**	**
103-084	4		2	53	60	156	1	0	0	0	0	1	2	131	71		3		41821	12	8	8	0	0	300	500	4500	1750	131	71	35.600000000000001	81	272.10000000000002	31.199999999999999	100	145	88	35.799999999999997	90	160	37.299999999999997	100	129	77	37.5	86	**	**	96
104-042	4		2	61	78	160.4	1	0	0	0	0	0	2	148	7.6		3		42107	5	10.0	9	0.0	0.0	2300	80	0	1000	148.0	76.0	36.8	85.0	**	**	100.0	155.0	91.0	35.5	98.0	**	**	100	142.0	83.0	37.1	93.0	**	**	**
104-052	4		2	64	62.1	155	0	0	0	0	0	1	2	122	65		1		42121	6.5	21.0	9.5	0.0	0.0	3500	350	0	0	122.0	65.0	35.7	97.0	141.8	34.5	100.0	99.0	62.0	36.5	100.0	105.2	40.2	97.8	85.0	54.0	37.4	95.0	**	**	97
104-053	4		2	34	55.8	152.2	0	0	0	0	0	0	1	125	74		1		42122	12	8.0	9.5	0.0	0.0	2800	430	0	800	125.0	74.0	34.7	104.0	256.7	37.4	100.0	81.0	40.0	35	88.0	42	88.5	100	99.0	43.0	37.5	101.0	**	**	**
104-059	4		2	60	53.4	153	0	0	0	0	0	1	3	115	91		3		42135	9	11.0	6	0.0	0.0	5000	300	0	2250	115.0	91.0	36.2	89.0	236.7	32.2	100.0	146.0	74.0	36.9	107.0	**	**	100	158.0	88.0	37.5	113.0	**	**	**
103-035	4		1	55	72	176	0	0	1	1	1	1	2	108	64		1		41724	2	7	9	0	0	10	0	500	20	108	64	36.399999999999999	79	**	**	100	113	76	36.399999999999999	78	**	**	100	110	68	37.399999999999999	96	**	**	**
103-135	4		1	65	63	168.7	1	0	0	0	0	1	2	123	68		3		41968	4.25	11	7	0	0	20	0	2100	530	123	68	35.700000000000003	68	271.10000000000002	40.700000000000003	99	141	59	36.200000000000003	79	126.3	39.5	100	154	73	36.600000000000001	58	**	**	**
104-003	4		1	65	64	167	0	1	1	0	0	0	2	163	78		2		42010	5.5	15.0	10	0.0	0.0	1550	150	0	400	163.0	78.0	36.4	87.0	**	**	100.0	157.0	82.0	37.2	92.0	**	**	100	113.0	83.0	37.2	61.0	**	**	**
104-050	4		1	65	76.4	159.2	1	1	0	0	0	1	2	162	81		2			5	10.0	9.5	0.0	0.0	2850	400	0	510	162.0	81.0	35.6	77.0	204.5	40.2	100.0	118.0	57.0	35	85.0	**	**	100	145.0	68.0	36.8	80.0	**	**	**
104-088	4		1	60	72.3	166	0	1	0	0	0	1	2	155	74		2		42206	3	10.0	6.5	0.0	0.0	1200	50	0	350	155.0	74.0	36.1	55.0	**	**	99.0	164.0	98.0	36.2	70.0	**	**	99	152.0	83.0	36.5	76.0	**	**	**
104-090	4		1	72	61.3	164	0	1	0	0	0	0	2	139	71		2		42207	5.5	21.0	loss	0.0	0.0	3400	500	0	100	139.0	71.0	35.7	75.0	**	**	99.0	168.0	64.0	37	89.0	**	**	97	126.0	74.0	37.6	92.0	**	**	**
104-108	4		1	72	60.7	157	1	0	1	1	1	0	3	176	65		3		42247	3	13.0	10	0.0	0.0	1700	10	0		176.0	65.0	34.7	55.0	266.1	35.5	100.0	146.0	75.0	36.1	69.0	147.9	38.9	100	136.0	70.0	38.0	64.0	**	**	98
103-009	4		2	65	89.5	148	1	1	0	1	0	1	3	165	94		3		41688	6.5	14	9	0	0	1700	500	3500	1800	165	94	36	96	282.80000000000001	26.5	100	138	89	36.700000000000003	117	237.30000000000001	37.100000000000001	100	125	76	36.100000000000001	104	**	**	98
103-024	4		2	74	59	149.5	1	0	0	0	0	1	2	161	96		2		41709	7.2	8	10	0	0	550	500	3400	200	161	96	36.100000000000001	79	324.5	29.100000000000001	100	136	65	36.799999999999997	88	127.7	38.299999999999997	97	132	66	36.899999999999999	83	**	**	100
103-032	4		2	49	56.6	158	0	0	1	0	0	1	3	134	73		1		41723	8.5	15	10	0	0	200	0	2550	400	134	73	36	135	256.19999999999999	30.899999999999999	96	115	80	36.100000000000001	105	**	**	99	122	76	36.5	105	**	**	98
103-056	4		2	60	70	145	1	0	0	0	0	0	2	127	82		3		41778	5.6	9	9	0	0	150	0	2200	500	127	82	35.299999999999997	75	248.09999999999999	32.600000000000001	98	138	72	36	81	**	**	99	124	79	36.799999999999997	75	**	**	91
103-061	4		2	55	52.1	153	0	1	1	0	0	1	2	121	73		2		41785	2	23	9	0	0	50	0	650	0	121	73	37.200000000000003	95	**	**	110	135	72	36.200000000000003	128	**	**	100	97	55	37.799999999999997	113	**	**	**
103-088	4		2	71	53.7	151	1	1	0	0	0	0	2	171	79		3		41835	3.25	13	8	0	0	50	0	1100	600	171	79	35.299999999999997	78	**	**	100	141	75	34.799999999999997	80	**	**	100	152	83	36.600000000000001	90	**	**	97
103-100	4		2	60	52.8	149	1	0	0	0	0	0	2	182	105		2		41869	3.25	13	6.5	0	0	30	0	1100	150	182	105	35	66	**	**	100	119	77	36	76	**	**	100	194	87	36.399999999999999	57	**	**	**
103-126	4		2	39	56.5	166.3	0	0	1	1	0	1	2	126	73		1		41939	3	6	7	0	0	10	0	700	250	126	73	35.100000000000001	72	281.19999999999999	35.299999999999997	100	115	74	35.700000000000003	80	**	**	100	104	72	36	66	**	**	**
104-010	4		2	50	87.6	165	0	0	0	0	0	0	2	156	93		1		42030	5	6.0	7.5	0.0	0.0	1900	100	0	400	156.0	93.0	34.9	99.0	257.6	35.9	99.0	110.0	63.0	35.6	79.0	230.8	34.6	99	112.0	63.0	37.0	87.0	**	**	**
104-039	4		2	58	52.8	148	0	1	0	0	0	1	2	102	43		1		42101	7	6.0	10	0.0	0.0	2300	700	500	550	102.0	43.0	36.0	120.0	**	**	100.0	119.0	57.0	36.1	96.0	**	**	99	98.0	48.0	37.1	96.0	**	**	**
104-075	4		2	64	62.1	155.2	1	0	0	0	0	0	2	155	79		3		42179	4.25	16.0	10	0.0	0.0	1700	500	0		155.0	79.0	36.5	75.0	298	27	100.0	153.0	78.0	36.2	88.0	231.9	37.7	100	132.0	80.0	36.6	83.0	**	**	**
104-124	4		2	59	68.9	171	0	0	0	0	0	0	2	150	80		1		42283	3.75	20.0	10	0.0	0.0	2700	10	0	2500	150.0	80.0	35.5	83.0	182.4	28.4	99.0	156.0	98.0	36.5	72.0	**	**	99	97.0	50.0	37.4	67.0	**	**	94
104-126	4		2	69	81.3	162	0	1	0	0	0	0	2	132	86		2		42289	3.75	11.0	10	0.0	0.0	2500	350	0	100	132.0	86.0	35.3	76.0	**	**	100.0	150.0	77.0	36.2	78.0	**	**	96	144.0	79.0	37.0	80.0	**	**	96
104-132	4		2	49	60.7	151	0	0	0	0	0	0	2	141	91		1		42298	4	13.0	7	0.0	0.0	1400	150	0	350	141.0	91.0	36.5	97.0	**	**	97.0	116.0	68.0	36.5	63.0	**	**	96	82.0	58.0	36.9	86.0	**	**	95
103-033	4		1	53	51.5	157.5	1	0	0	0	0	1	3	180	83		3		41723	4.5	12	10	0	0	10	0	1450	0	180	83	36.399999999999999	86	191.69999999999999	39.399999999999999	99	148	77	36.5	85	**	**	99	167	87	37.299999999999997	97	**	**	98
104-060	4		1	73	65.7	165	1	1	0	0	0	1	3	182	85		2		42136	5	10.0	9	0.0	0.0	2500	150	0	280	182.0	85.0	35.8	85.0	245.3	32.7	100.0	155.0	78.0	36	76.0	**	**	100	159.0	89.0	35.8	72.0	**	**	**
103-005	4		2	59	65.3	154	0	1	0	0	0	0	2	104	50		2		41680	5	26	9	0	0	200	0	2050	250	104	50	36.399999999999999	71	**	**	100	166	79	36.5	89	**	**	100	130	76	37.200000000000003	126	**	**	95
103-062	4		2	51	56	162	0	0	0	0	0	1	2	112	66		2		41785	6	13	7.5	0	0	100	500	2500		112	66	35	105	290.39999999999998	33.600000000000001	100	137	67	36.299999999999997	90	**	**	100	116	63	36.799999999999997	81	**	**	**
103-080	4		2	52	57.1	152.5	0	0	0	0	0	1	3	137	91		2		41814	4	14	9	0	0	20	0	2200	150	137	91	36.799999999999997	79	222.69999999999999	31.800000000000001	100	146	74	35.5	91	**	**	100	132	81	37.200000000000003	94	**	**	**
103-120	4		2	50	54.6	154	0	0	0	0	0	1	2	104	53		1		41918	4	12	9	0	0	50	0	1600	100	104	53	35.899999999999999	92	**	**	100	137	68	35.299999999999997	89	**	**	100	121	66	37	95	**	**	**
103-121	4		2	65	65.7	149	1	0	0	0	0	0	2	114	65		3		41918	8.5	48	8	0	0	200	0	5100	2000	114	65	35.100000000000001	90	255.59999999999999	38.399999999999999	100	130	81	36	102	78.099999999999994	31.899999999999999	100	137	76	37.700000000000003	109	**	**	98
103-130	4		2	60	63.2	161.5	1	1	0	0	0	0	2	123	53		3		41946	9.5	8	9	0	0	200	0	4100	1100	123	53	36.200000000000003	60	251.09999999999999	28.699999999999999	100	150	56	33.799999999999997	67	183.90000000000001	39.600000000000001	100	125	69	35.799999999999997	73	**	**	97
103-131	4		2	59	57.8	156	1	0	0	0	0	0	2	156	83		3		41947	4	24	9	0	0	20	0	2500	1040	156	83	36	65	**	**	100	149	85	36.100000000000001	76	**	**	100	129	63	36.899999999999999	76	**	**	**
104-021	4		2	58	43.7	145	1	0	0	0	0	0	2	151	82		3		42073	10.5	72.0	8	0.0	0.0	3000		1250	450	151.0	82.0	36.6	98.0	204.2	37.5	100.0	149.0	91.0	36.1	101.0	46.1	40.7	100	143.0	96.0	36.9	110.0	**	**	99
104-051	4		2	36	55.9	163	0	0	0	0	0	0	2	106	66		1		42121	3.5	14.0	9	0.0	0.0	1800	200	0	290	106.0	66.0	35.5	80.0	292.2	31.7	100.0	109.0	55.0	34.9	76.0	**	**	100	120.0	60.0	36.4	78.0	**	**	**
104-129	4		2	41	67	153.4	0	0	0	0	0	0	2	157	89		2		42290	4.6	10.0	10	0.0	0.0	1400	50	0	300	157.0	89.0	35.6	86.0	**	**	99.0	152.0	94.0	36.7	80.0	**	**	99	138.0	86.0	37.0	80.0	**	**	**
104-131	4		2	62	62.4	166	1	1	0	0	0	0	2	172	77		3		42297	8.25	20.0	8	0.0	0.0	3350	100	0	250	172.0	77.0	36.2	72.0	176.8	35.7	95.0	122.0	59.0	36.6	81.0	**	**	99	123.0	59.0	36.9	78.0	**	**	98
103-007	4		1	55	94.9	170	0	0	0	0	0	0	2	150	84		2		41687	5.3	21	9	0	0	50	0	2600	150	150	84	36	79	**	**	100	152	77	36.299999999999997	88	**	**	100	153	83	37.299999999999997	86	**	**	**
103-055	4		1	72	59.7	156.1	1	1	0	0	0	1	3	153	73		3		41773	7	27	9	0	0	300	500	2700	300	153	73	35.299999999999997	91	268.10000000000002	39.100000000000001	100	172	80	35.700000000000003	100	119.8	37.700000000000003	100	146	72	36.899999999999999	88	**	**	98
103-074	4		1	67	71.2	167.5	0	0	0	1	0	0	2	143	102		2		41794	5	9	9	0	0	120	0	1700	100	143	102	35.700000000000003	71	287.80000000000001	34.299999999999997	100	135	88	36	74	**	**	100	140	72	36.200000000000003	72	**	**	**
103-107	4		1	70	72.8	170.3	1	1	1	1	0	0	3	124	68		2		41884	3.25	13	9	0	0	200	0	1900	150	124	68	36.299999999999997	62	**	**	100	128	74	36.200000000000003	64	**	**	100	135	72	37.5	71	**	**	**
103-139	4		1	41	70	170	1	0	1	1	0	0	2	185	89		3		41974	5.5	15	7	0	0	200	0	1700	450	185	89	35.700000000000003	119	**	**	100	128	91	36.5	102	**	**	100	136	92	36.299999999999997	101	**	**	**
104-013	4		1	60	61	156.5	0	0	0	1	0	0	2	122	55		1		42031	8.5	7.0	7.5	0.0	0.0	3100	300	0	780	122.0	55.0	36.2	61.0	328	34.2	100.0	106.0	66.0	37.4	65.0	196.9	41.2	100	103.0	59.0	36.3	73.0	**	**	100
104-017	4		1	56	62.8	168.4	1	0	1	1	1	1	2	145	90		2		42066	3.75	16.0	5.5	0.0	0.0	1400	100	0	250	145.0	90.0	35.0	81.0	266	39.7	100.0	127.0	86.0	36	80.0	196.4	42.1	100	112.0	73.0	38.6	117.0	**	**	**
104-026	4		1	66	65.7	163	1	0	0	0	0	0	2	119	84		3		42086	9.5	22.0	8	0.0	0.0	2800	350	0	650	119.0	84.0	35.7	94.0	308.6	39.7	100.0	135.0	88.0	35	109.0	104.8	31.6	100	125.0	70.0	36.5	102.0	**	**	**
104-047	4		1	61	79	170	1	1	0	1	0	0	2	141	83		3		42114	6	8.0	10	0.0	0.0	2050	100	0	200	141.0	83.0	35.6	115.0	**	**	100.0	109.0	74.0	35.1	93.0	**	**	100	127.0	83.0	37.0	75.0	**	**	**
104-081	4		1	59	64.2	170.5	0	0	0	0	0	1	3	125	80		2		42191	5	20.0	10	0.0	0.0	2900	250	0	200	125.0	80.0	36.0	95.0	265.8	34.7	100.0	142.0	91.0	36.2	101.0	193.8	37.9	100	125.0	83.0	36.5	90.0	**	**	98
104-087	4		1	42	71.1	180	0	0	0	0	0	0	3	112	67		1		42206	7	31.0	10	0.0	0.0	3750	1300	1000	1000	112.0	67.0	35.5	76.0	303.6	34.2	100.0	110.0	58.0	38.1	100.0	**	**	96	109.0	58.0	36.9	80.0	**	**	96
104-094	4		1	52	66.4	164.5	0	0	0	0	0	0	2	129	85		2		42213	6	10.0	10	0.0	0.0	2200	100	0	350	129.0	85.0	35.6	64.0	**	**	100.0	159.0	97.0	36	89.0	**	**	98	137.0	92.0	37.0	80.0	**	**	96
103-046	4		2	39	49.7	149	0	0	0	0	0	1	2	132	64		2		41751	4	22	8	0	0	300	0	2950	250	132	64	34	96	292	31	100	150	84	35	89	**	**	100	140	93	37.399999999999999	93	**	**	**
103-051	4		2	48	57.2	159.6	0	0	0	0	0	1	2	110	70		1		41765	3.5	9	9	0	0	10	0	1200	150	110	70	35	71	319.10000000000002	28.100000000000001	100	119	69	35.399999999999999	94	**	**	100	114	68	36.100000000000001	74	**	**	**
103-052	4		2	52	69.3	157.7	0	0	0	0	0	0	1	138	77		1		41765	4.25	9	9	0	0	400	250	4000	600	138	77	36	88	**	**	100	133	60	36	69	**	**	100	93	51	37	66	**	**	**
103-072	4		2	57	74	153	1	1	0	0	0	0	2	157	66		3		41793	4.5	20	9	0	0	200	500	2200	450	157	66	35.399999999999999	52	306.10000000000002	32.100000000000001	97	137	78	36.200000000000003	106	**	**	98	108	68	36	98	**	**	99
103-089	4		2	52	80	155	1	0	0	0	0	0	2	124	61		3		41848	3	5	10	0	0	50	0	1500	200	124	61	36.600000000000001	86	**	**	99	128	70	37.700000000000003	89	**	**	99	166	90	36.5	90	**	**	**
103-124	4		2	35	60.8	150.5	0	0	0	0	0	1	2	148	41		2		41926	4	10	9	0	0	350	0	1800	200	148	41	36.299999999999997	84	**	**	100	145	90	37.100000000000001	83	**	**	100	139	95	37.299999999999997	87	**	**	**
104-033	4		2	63	70.6	150	0	0	0	0	0	0	3	123	88		2		42093	4	11.0	7	0.0	0.0	1700	50	0	200	123.0	88.0	36.3	98.0	**	**	99.0	119.0	65.0	36	118.0	**	**	99	169.0	82.0	37.4	96.0	**	**	98
104-063	4		2	59	70.1	154	1	1	0	0	0	0	3	169	79		2		42144	8	9.0	8	0.0	0.0	5000	2100	2800		169.0	79.0	35.0	73.0	238.6	38.6	100.0	151.0	64.0	36.4	76.0	93.1	35.6	97	137.0	66.0	37.3	84.0	**	**	99
104-083	4		2	61	59.2	156	1	0	0	0	0	1	2	170	100		3		42198	3.6	9.0	10	0.0	0.0	900	30	0	120	170.0	100.0	36.7	85.0	**	**	100.0	140.0	86.0	18	86.0	**	**	98	178.0	95.0	37.0	62.0	**	**	94
104-125	4		2	46	66.1	164	0	0	0	0	0	0	2	142	80		1		42289	6.5	10.0	8	0.0	0.0	2800	200	0	600	142.0	80.0	35.4	81.0	**	**	99.0	122.0	71.0	35.5	69.0	**	**	99	116.0	69.0	36.9	86.0	**	**	**
104-137	4		2	71	57.1	151	1	0	0	0	0	0	3	135	69		3		42304	4	9.0	7.5	0.0	0.0	1500	50	0	150	135.0	69.0	36.2	82.0	**	**	100.0	145.0	84.0	36.6	90.0	**	**	100	121.0	72.0	37.0	82.0	**	**	100
104-138	4		2	56	59.6	154.5	0	0	0	0	0	0	3	184	95		2		42304	6	11.0	10	0.0	0.0	3200	200	0	600	184.0	95.0	36.1	79.0	233.5	37.7	100.0	155.0	82.0	36.5	75.0	135.3	37.5	100	157.0	90.0	36.1	74.0	**	**	97
104-148	4		2	31	50	160	0	0	0	0	0	0	3	101	61		1		13670035200	3.5	7.0	10.0	0.0	0.0	1500	50	0	30	101.0	61.0	36.1	53.0	**	**	100.0	85.0	44.0	37.0	90.0	**	**	97.0	85.0	51.0	37.2	76.0	**	**	**
103-028	4		1	50	65	167.8	0	0	0	1	0	0	1	113	56		1		41715	5	12	10	0	0	30	0	2000	250	113	56	36.299999999999997	73	**	**	100	117	67	36	71	**	**	100	135	74	37.100000000000001	67	**	**	**
103-075	4		1	39	62.2	175	0	0	1	1	1	1	2	135	90	999	2		41794	3	8	9	0	0	20	0	1100	800	135	90	36.200000000000003	99	**	**	100	151	92	36.799999999999997	95	**	**	100	101	66	35.799999999999997	87	**	**	97
103-081	4		1	60	91.6	165	0	0	0	0	0	1	2	148	86		2		41814	3.75	16	9	0	0	100	0	1200	100	148	86	36.200000000000003	74	**	**	100	145	83	35.600000000000001	85	**	**	100	169	100	36.700000000000003	96	**	**	**
103-087	4		1	64	64.7	154	1	0	0	1	0	0	2	164	65		3		41834	5	12	9	0	0	50	0	1900	300	164	65	35.600000000000001	80	**	**	100	137	75	36.399999999999999	84	**	**	100	135	76	36.899999999999999	75	**	**	**
104-064	4		1	49	81.3	169	1	0	1	0	0	1	2	132	74		3		42156	2.5	5.0	8	0.0	0.0	1500	150	150	100	135.0	74.0	35.8	62.0	**	**	100.0	122.0	78.0	35.2	85.0	**	**	99	126.0	85.0	36.5	75.0	**	**	**
104-115	4		1	44	100	174	0	0	0	0	0	0	2	152	86		2		42261	5.75	16.0	10	0.0	0.0	3800	1500	500	150	152.0	86.0	34.9	89.0	127.8	39.1	100.0	121.0	69.0	37.6	118.0	176.7	34.7	100	123.0	70.0	37.1	115.0	**	**	100
103-002	4		2	41	72	175	1	0	0	0	0	0	2	126	79		3		41652	3.25	12	9	0	0	100	0	1200	200	126	79	36.799999999999997	88	**	**	100	116	76	38.100000000000001	81	**	**	100	133	84	37.799999999999997	98	**	**	**
103-004	4		2	74	64.6	158	0	0	0	0	0	0	2	106	61		1		41680	4.75	11	9	0	0	100	0	1900	50	106	61	35.799999999999997	59	**	**	100	183	77	36.600000000000001	77	**	**	100	150	71	36.899999999999999	80	**	**	**
103-064	4		2	48	62.5	155.4	1	0	0	0	0	0	2	144	83		2		41785	5	15	10	0	0	100	0	2300	1300	144	83	36.299999999999997	118	**	**	100	124	81	36.700000000000003	87	**	**	100	121	74	37.299999999999997	104	**	**	**
103-125	4		2	49	73.7	152.5	0	0	0	0	0	0	3	129	49		2		41926	5.25	10	7	0	0	500	0	3600	300	129	49	35.799999999999997	94	255.09999999999999	75.900000000000006	98	153	97	36	90	143.40000000000001	39.5	100	105	70	37.799999999999997	104	**	**	**
104-019	4		2	61	57.1	148	1	0	0	0	0	0	2	177	72		2		42072	5.5	9.0	9	0.0	0.0	2200	200	0	500	177.0	72.0	35.9	80.0	212.6	31.2	100.0	156.0	90.0	36	97.0	172	35.7	100	130.0	79.0	37.1	102.0	**	**	**
104-055	4		2	49	54.1	161	0	0	1	0	0	0	2	181	81		2		42129	3	5.0	9	0.0	0.0	600	20	0	0	181.0	81.0	35.9	67.0	**	**	100.0	119.0	71.0	35.5	75.0	**	**	100	105.0	67.0	36.5	70.0	**	**	**
103-006	4		1	71	58	165	1	1	0	0	0	1	3	127	80		3		41680	6.25	12	9	0	0	700	0	4450	250	127	80	36.200000000000003	61	294.30000000000001	32.299999999999997	99.700000000000003	142	81	36.799999999999997	100	**	**	100	115	75	37.799999999999997	89	**	**	100
103-023	4		1	54	62.4	152	1	0	1	1	1	1	2	135	78		3		41708	7	7	8	0	0	100	0	1800	500	135	78	36.5	88	291	37.600000000000001	100	108	74	36.799999999999997	71	104.90000000000001	36.899999999999999	100	102	55	36.799999999999997	65	**	**	**
103-083	4		1	74	72.3	165	1	1	1	1	0	0	2	111	53		3		41821	11	16	8	0	0	250	0	4500	600	111	53	35.299999999999997	79	276.69999999999999	35.899999999999999	100	154	72	36.200000000000003	75	177.09999999999999	39.600000000000001	100	113	48	36	80	**	**	95
103-123	4		1	60	66.4	171	0	0	1	1	0	1	2	132	77		2		41925	6.5	17	8	0	0	400	0	3200	300	132	77	36.5	96	**	**	100	170	96	35.5	97	**	**	100	129	83	36.5	97	**	**	94
104-008	4		1	71	56.6	159.5	1	0	0	0	0	1	2	154	83		2		42024	5	7.0	10	0.0	0.0	2500	400	0	400	154.0	83.0	36.5	88.0	291.3	34.6	100.0	176.0	97.0	36.5	78.0	207.3	37	100	144.0	77.0	37.4	61.0	**	**	**
104-012	4		1	58	67.4	155.3	1	0	0	1	0	1	3	126	85		3		42031	4	7.0	10	0.0	0.0	1800	50	0	250	126.0	85.0	35.0	101.0	369.5	36.4	99.0	152.0	94.0	35.9	101.0	**	**	100	126.0	90.0	37.1	103.0	**	**	**
104-028	4		1	57	59.5	163.5	0	0	0	1	0	1	2	109	59		2		42086	6	11.0	9	0.0	0.0	1600	50	0	100	109.0	59.0	35.2	64.0	**	**	100.0	143.0	78.0	35	64.0	**	**	100	160.0	70.0	36.8	61.0	**	**	**
104-086	4		1	70	83	178	0	0	0	0	0	0	2	148	76		2		42205	7.5	12.0	8.5	0.0	0.0	3500	100	0	350	148.0	76.0	35.8	71.0	212.3	34.7	100.0	134.0	85.0	37.9	85.0	168.9	37.2	99.6	157.0	69.0	38.2	81.0	**	**	96
104-093	4		1	58	77.5	170	1	1	0	0	0	1	2	152	81		3		42213	2.75	9.0	10	0.0	0.0	1400	20	0	300	152.0	81.0	35.0	56.0	**	**	98.0	174.0	90.0	35.4	79.0	**	**	98	153.0	98.0	37.1	84.0	**	**	**
104-095	4		1	60	79.3	159	1	1	0	0	0	0	2	174	83		3		42213	8	22.0	10	0.0	0.0	3600	880	0	900	174.0	83.0	36.7	66.0	**	**	100.0	118.0	70.0	36	72.0	**	**	100	115.0	66.0	37.0	79.0	**	**	**
104-102	4		1	64	79	165	0	0	1	1	0	1	2	143	83		1		42226	5	10.0	10	0.0	0.0	2150	200	0	250	143.0	83.0	36.0	80.0	238.2	31.7	100.0	138.0	82.0	36	96.0	**	**	100	114.0	84.0	36.8	101.0	**	**	98
104-111	4		1	71	70.9	163	0	1	0	0	0	1	2	150	74		2		42254	3.5	12.0	10	0.0	0.0	1300	50		600	150.0	74.0	34.7	88.0	235.6	35.5	100.0	124.0	72.0	36.9	97.0	132.6	41.7	100	128.0	63.0	37.5	84.0	**	**	98
104-114	4		1	54	78	163	1	0	0	0	0	0	2	152	77		3		42260	7.5	13.0	8	0.0	0.0	4400	200	2500	4000	152.0	77.0	35.0	80.0	136.6	35.1	100.0	153.0	102.0	37	95.0	179.3	35.6	100	123.0	79.0	36.0	63.0	**	**	99
104-128	4		1	63	71.4	170.5	0	0	0	0	0	1	2	129	78		2		42290	5.5	8.0	9.5	0.0	0.0	2100	150	0	650	129.0	78.0	36.5	65.0	**	**	96.0	120.0	67.0	36.7	80.0	**	**	97	131.0	79.0	36.8	85.0	**	**	95
103-014	4		2	23	66.5	168	0	0	0	1	0	0	1	108	66		1		41694	3	4	9	0	0	20	0	1500	1000	108	66	35.899999999999999	75	**	**	100	115	63	36.600000000000001	76	**	**	100	112	65	36	63	**	**	**
103-015	4		2	70	71	152.6	1	0	0	0	0	0	2	129	69		3		41701	5	9	9	0	0	100	0	2050	50	129	69	36	77	247.5	31.300000000000001	100	116	74	35.5	61	144.5	28.5	100	115	68	37.799999999999997	70	247.5	31.300000000000001	93
103-018	4		2	71	59.5	152.2	0	0	0	0	0	0	3	76	48		1		41703	2.5	6	9	0	0	300	0	2000	200	76	48	37.200000000000003	79	**	**	100	115	64	36.799999999999997	104	**	**	100	108	59	37.100000000000001	81	**	**	95
103-037	4		2	33	46.8	158.1	0	0	0	0	0	0	2	107	41		1		41736	4	6	10	0	0	100	0	1600	70	107	41	35.299999999999997	84	**	**	100	126	80	36.200000000000003	92	**	**	100	102	67	37.100000000000001	79	**	**	**
103-043	4		2	47	44	153	0	0	0	0	0	0	1	138	74		1		41743	2.25	6	10	0	0	50	0	1100	100	138	74	35.799999999999997	72	**	**	97	114	70	37	73	**	**	97	121	76	37	79	**	**	**
103-057	4		2	71	38.9	149.5	1	0	0	0	0	1	2	150	85		3		41778	2.15	5	9	0	0	20	0	800	300	150	85	36.899999999999999	98	**	**	99	135	84	37	94	**	**	99	108	78	37.600000000000001	80	**	**	**
103-070	4		2	47	67.5	154.4	0	0	0	0	0	0	2	121	76		2		41793	12	12	9	0	0	350	0	3300	300	121	76	35.200000000000003	103	134.30000000000001	52	98	122	70	35.700000000000003	86	179	31.300000000000001	100	101	53	37.600000000000001	91	**	**	**
103-092	4		2	57	62.3	162.5	0	0	0	0	0	0	2	112	49		2		41856	5	13	10	0	0	450	0	3050	200	112	49	35.700000000000003	58	223.09999999999999	31.300000000000001	100	91	53	35.399999999999999	56	**	**	100	109	71	36.399999999999999	55	**	**	**
103-122	4		2	47	48.4	160.5	0	0	0	0	0	0	2	100	34		1		41918	4.75	6	9	0	0	600	0	2800	500	100	34	35.5	80	**	**	99	124	66	35.799999999999997	94	**	**	99	106	58	37.899999999999999	80	**	**	**
103-138	4		2	52	65.5	160.5	0	0	0	0	0	0	2	136	67		1		41968	5.75	11	9	0	0	350	0	2700	600	136	67	35.600000000000001	111	**	**	98	125	73	37	116	**	**	99	115	72	36.5	102	**	**	93
104-001	4		2	71	66.7	157.5	1	0	0	0	0	0	2	147	72		3		42009	5	10.0	10	0.0	0.0	1700	50	0	250	147.0	72.0	35.3	57.0	238.2	39.6	99.0	127.0	55.0	35.6	96.0	182.4	37	99	113.0	48.0	37.4	69.0	**	**	96
104-005	4		2	36	44.3	164	0	0	0	0	0	1	2	102	77		1		42023	8	19.0	10	0.0	0.0	3800	350	500	300	102.0	77.0	35.3	71.0	**	**	100.0	95.0	65.0	35.4	102.0	35	44.6	100	94.0	56.0	37.9	63.0	**	**	95
104-018	4		2	61	56.9	148	1	0	0	0	0	0	2	142	91		2		42072	3	11.0	10	0.0	0.0	1500	50	0	450	142.0	91.0	35.6	75.0	**	**	100.0	147.0	82.0	35.2	72.0	**	**	100	150.0	87.0	37.8	75.0	**	**	100
104-032	4		2	63	95.8	163	0	0	0	0	0	0	2	159	82		2		42093	3	5.0	9	0.0	0.0	1600	200	0	250	159.0	82.0	35.3	79.0	**	**	98.0	156.0	76.0	36.7	73.0	**	**	98	143.0	65.0	36.0	84.0	**	**	**
104-133	4		2	64	67	163.1	1	1	0	1	0	0	2	129	65		3		42303	10.5	10.0	10	0.0	0.0	6200	1700	100	400	129.0	65.0	36.2	65.0	314.2	33.2	100.0	135.0	68.0	36.1	101.0	93.9	31.2	98	145.0	71.0	36.6	97.0	**	**	**
104-140	4		2	56	56.7	156.1	0	0	0	0	0	0	2	126	69		1		42326	3.7	14.0	10	0.0	0.0	1200	300	0	650	126.0	69.0	36.2	90.0	301.7	33.6	100.0	114.0	76.0	37.4	109.0	**	**	97	117.0	77.0	35.6	98.0	**	**	**
103-030	4		1	56	54.9	153.6	0	0	1	1	0	1	2	112	49		1		41716	3.5	6	10	0	0	50	0	1000	0	12	49	36.899999999999999	73	**	**	100	94	41	35.700000000000003	73	**	**	100	85	43	37.399999999999999	59	**	**	**
103-073	4		1	52	73.3	165	1	1	0	1	0	1	2	175	103		3		41793	1.75	8	10	0	0	10	0	800	30	175	103	34.799999999999997	76	**	**	100	132	77	36	107	**	**	100	129	85	37.399999999999999	85	**	**	**
103-127	4		1	57	72	163	1	0	0	1	0	0	2	168	97		3		41940	4.5	16	8	0	0	200	0	2650	200	168	97	36	85	174.19999999999999	32.799999999999997	100	132	85	36.700000000000003	100	**	**	100	125	82	37.5	99	**	**	**
103-016	4		2	40	58	156	0	0	0	0	0	1	1	114	65		1		41701	2	9	10	0	0	30	0	1100	0	114	65	37.100000000000001	97	**	**	100	103	50	37.100000000000001	95	**	**	100	105	66	36.899999999999999	104	**	**	**
103-031	4		2	53	51.7	146.5	0	0	0	0	0	0	2	139	81		2		41717	5.25	11	10	0	0	30	0	2250	300	139	81	36.299999999999997	108	**	**	98	154	99	36.799999999999997	120	**	**	100	129	80	37.5	108	**	**	**
103-050	4		2	40	73	160	0	0	0	0	0	0	2	145	76		2		41764	4	12	8	0	0	20	0	1900	70	145	76	36.100000000000001	100	**	**	100	153	85	37.799999999999997	96	**	**	100	136	88	37.200000000000003	99	**	**	**
103-053	4		2	47	52	166	1	0	0	0	0	0	2	137	81		2		41771	6	6	9	0	0	50	0	1700	550	137	81	35.899999999999999	78	293.19999999999999	32.100000000000001	100	136	90	36	76	**	**	100	121	83	36.600000000000001	65	**	**	**
103-071	4		2	66	72.4	154.6	1	1	0	0	0	0	3	144	85		2		41793	5.5	27	9	0	0	150	0	2900	150	144	85	35.600000000000001	91	184.19999999999999	29.5	100	121	65	36.600000000000001	109	117.3	30.600000000000001	100	146	81	36.399999999999999	116	**	**	92
103-076	4		2	46	60.4	160	1	0	0	0	0	0	2	149	60		3		41794	3.5	10	10	0	0	50	0	1300	700	149	60	35.299999999999997	60	**	**	100	141	80	36.799999999999997	77	**	**	99	128	80	37.299999999999997	74	**	**	**
103-079	4		2	60	61.2	148.3	1	1	0	0	0	1	3	119	94		2		41813	9.35	20	9	0	0	200	0	2700	150	119	94	33.700000000000003	93	186.5	55.899999999999999	100	145	62	34.799999999999997	92	85.299999999999997	32.299999999999997	100	148	75	36.299999999999997	85	**	**	**
104-023	4		2	56	53.9	152.2	1	0	0	0	0	0	2	132	77		3		42080	8	18.0	5.5	0.0	0.0	3000	2100	1500	750	132.0	77.0	36.5	75.0	311.5	31.9	100.0	110.0	75.0	37.6	87.0	195.5	33.7	100	102.0	65.0	38.0	101.0	**	**	**
104-030	4		2	53	51.1	155	0	0	0	0	0	0	1	166	77		2		42087	3	9.0	7	0.0	0.0	1400	20	0	200	166.0	77.0	36.4	92.0	**	**	100.0	142.0	81.0	35.7	94.0	**	**	100	119.0	68.0	37.0	75.0	**	**	**
104-142	4		2	52	44.3	155.2	0	0	0	0	0	0	2	185	84		2		42331	4	16.0	9	0.0	0.0	1100	30	0	550	185.0	84.0	35.5	74.0	**	**	100.0	135.0	63.0	36.2	80.0	**	**	100	142.0	83.0	36.0	79.0	**	**	97
103-038	4		1	55	54.1	161	1	0	0	1	0	0	2	144	86		3		41737	3.3	11	9	0	0	50	0	1400	50	144	86	34.600000000000001	96	**	**	100	159	89	36.899999999999999	103	**	**	100	164	103	37.399999999999999	97	**	**	**
103-039	4		1	61	60	158.5	0	0	0	1	0	0	2	107	40		1		41737	3	12	10	0	0	80	0	1650	100	107	40	35.600000000000001	61	**	**	99	103	50	35.399999999999999	89	**	**	100	116	55	36.200000000000003	97	**	**	**
103-042	4		1	62	82	156.5	1	0	0	0	0	0	2	170	93		3		41744	4	11	9	0	0	100	0	1400	150	170	93	34.799999999999997	78	**	**	100	157	81	36.5	88	**	**	100	165	82	36.5	84	**	**	**
103-047	4		1	48	80	171	1	0	0	0	0	0	2	165	70		3		41752	4.5	8	10	0	0	10	0	1500	100	165	70	36	81	128.90000000000001	35.399999999999999	99	121	73	36.5	61	**	**	99	118	77	36.899999999999999	90	**	**	**
103-104	4		1	62	73	158	1	1	0	0	0	1	3	194	68		2		41883	2.5	5	10	0	0	250	0	1000	5	194	68	37.299999999999997	91	199.30000000000001	30.5	97	150	76	36.899999999999999	109	109.7	40.700000000000003	97	153	79	36.799999999999997	103	**	**	99
104-029	4		1	49	54.9	156	1	0	0	1	0	0	2	113	64		3		42086	3.75	15.0	9	0.0	0.0	2400	100	0	100	113.0	64.0	35.1	76.0	**	**	100.0	117.0	76.0	34.1	57.0	**	**	100	139.0	86.0	36.4	80.0	**	**	**
104-031	4		1	72	65.2	158	0	0	0	0	0	0	2	130	81		2		42093	4.5	12.0	10	0.0	0.0	2650	150	0	860	130.0	81.0	36.0	77.0	**	**	100.0	150.0	95.0	36	106.0	**	**	100	102.0	63.0	36.4	77.0	**	**	97
104-065	4		1	69	69	159	0	0	1	0	0	0	2	148	83		2		42157	8.5	8.0	8	0.0	0.0	2350	200	0	320	148.0	83.0	35.2	83.0	226.1	39.4	99.0	147.0	72.0	36.2	72.0	124.1	42.4	100	133.0	61.0	36.2	62.0	**	**	**
104-082	4		1	54	56	165	1	0	0	0	0	0	3	155	88		3		42192	7	38.0	10	0.0	0.0	4100	900	2000	200	155.0	88.0	35.0	56.0	285	35.7	100.0	128.0	75.0	37.1	91.0	83.2	39.6	100	102.0	74.0	39.0	120.0	**	**	99
103-040	4		2	73	50	150	1	1	0	0	0	1	2	150	50		3		41743	2.5	14	9	0	0	100	0	1200	10	150	50	36	128	**	**	100	97	48	36	119	**	**	100	112	57	36.799999999999997	126	**	**	93
103-044	4		2	55	71.6	145	1	1	0	0	0	0	2	123	52		2		41744	3	30	9	0	0	50	0	1300	50	123	52	37	83	200.30000000000001	28.399999999999999	100	117	60	35.799999999999997	65	**	**	100	133	70	36.600000000000001	98	**	**	**
103-045	4		2	62	63.9	147.9	1	1	0	0	0	0	2	171	88		3		41750	4.5	12	9	0	0	30	0	1900	350	171	88	36.100000000000001	81	**	**	100	177	89	36.299999999999997	84	**	**	100	144	80	37.200000000000003	86	**	**	**
103-054	4		2	58	60	160	1	1	0	0	0	1	2	121	65		3		41772	2.75	11	10	0	0	50	0	1800	100	121	65	36.399999999999999	81	**	**	98	130	71	36.100000000000001	94	**	**	99	131	83	37.100000000000001	105	**	**	**
103-066	4		2	60	57	153	0	0	0	0	0	0	2	107	48		2		41786	5	7	10	0	0	250	0	2050	50	107	48	36.299999999999997	68	260.69999999999999	32.899999999999999	100	116	71	36.399999999999999	71	91.200000000000003	37.600000000000001	100	113	73	37.299999999999997	92	**	**	98
103-116	4		2	49	60.6	160.9	0	0	0	0	0	1	2	129	71		1		41911	3.5	15	9	0	0	30	0	1500	200	129	71	36	70	318.39999999999998	29.399999999999999	100	124	69	36.200000000000003	61	**	**	100	138	77	36.799999999999997	76	**	**	**
103-117	4		2	56	59.9	160.4	0	0	0	0	0	0	2	104	44		1		41911	6	21	9	0	0	250	500	2700	500	104	44	35.899999999999999	78	287.89999999999998	30.300000000000001	100	117	68	36.600000000000001	84	199.80000000000001	34.600000000000001	100	107	52	37.299999999999997	79	**	**	**
103-136	4		2	39	51.3	158.2	0	0	0	0	0	0	1	107	54		1		42333	11	11	8	0	0	250	0	2700	700	107	54	34.899999999999999	100	299.39999999999998	39.299999999999997	99	109	50	37.200000000000003	89	**	**	99	105	45	36.100000000000001	83	**	**	**
104-002	4		2	64	58	158	1	1	0	0	0	0	2	130	52		3		42010	5.5	9.0	9	0.0	0.0	3100	1025	500	300	130.0	52.0	35.7	46.0	**	**	100.0	141.0	67.0	35.7	53.0	**	**	100	116.0	63.0	36.0	61.0	**	**	**
104-049	4		2	57	43	145	0	0	0	0	0	1	1	115	53		1		42115	4	17.0	8	0.0	0.0	1300	30	0	100	115.0	53.0	36.1	76.0	**	**	100.0	122.0	67.0	35.2	87.0	**	**	100	123.0	75.0	37.5	73.0	**	**	**
104-100	4		2	73	47.6	153	1	0	0	0	0	1	3	121	70		3		42226	12	10.0	10	0.0	0.0	4500	500	500	1290	121.0	70.0	35.0	83.0	185.7	32.2	100.0	96.0	53.0	38.4	101.0	97.4	35.6	99	102.0	53.0	38.2	91.0	**	**	98
104-109	4		2	44	41.6	146	0	0	0	0	0	0	1	123	69		2		42248	3	11.0	8	0.0	0.0	1800	30	0	50	123.0	69.0	35.9	77.0	**	**	100.0	154.0	89.0	36.7	93.0	**	**	**	140.0	87.0	37.1	70.0	**	**	**
104-134	4		2	48	74.8	166.5	0	0	0	0	0	0	2	107	65		1		42304	14	8.0	10	0.0	0.0	5000	400	0	1940	107.0	65.0	36.0	70.0	211.3	33.1	99.0	106.0	67.0	37.2	93.0	**	**	100	108.0	60.0	36.9	88.0	**	**	**
103-137	4		1	73	71.8	169.5	1	0	1	1	1	1	3	109	75		3		41968	3.25	11	9	0	0	20	0	1300	350	109	75	34.799999999999997	68	**	**	100	174	85	35	64	**	**	100	113	51	37.299999999999997	97	**	**	98
103-106	4		2	31	52	163	0	0	0	0	0	0	2	151	83		1		41884	4	7	10	0	0	50	0	1500	100	151	83	35.100000000000001	84	**	**	100	128	75	36.100000000000001	76	**	**	100	110	74	37.399999999999999	79	**	**	**
104-044	4		2	64	68	149	1	0	0	0	0	1	2	167	120		3		42107	6	24.0	10	0.0	0.0	2650	300	0	850	167.0	120.0	35.8	78.0	**	**	99.0	144.0	93.0	36.9	96.0	**	**	99	131.0	90.0	37.1	88.0	**	**	**
103-069	4		1	70	66.9	177.7	1	1	0	0	0	1	3	92	48		3		41787	8	10	5.5	0	0	350	500	3000	750	92	48	36.299999999999997	71	164	36.700000000000003	100	139	74	36.299999999999997	84	127.59999999999999	32.799999999999997	100	120	76	36.5	76	**	**	**
103-095	4		1	38	82.8	160	1	0	1	1	1	1	2	110	64		3		41857	3.45	7	8	0	0	800	750	3350		110	64	36.5	86	247.90000000000001	33.200000000000003	100	116	72	35.700000000000003	88	**	**	100	130	77	36	104	**	**	**
103-140	4		1	48	62.5	172	0	0	1	1	1	0	2	118	67		2		42339	5.5	12	7	0	0	10	0	2400	100	118	67	35.899999999999999	81	**	**	100	149	80	36.799999999999997	83	**	**	100	140	76	35.299999999999997	81	**	**	99
104-099	4		1	66	64.4	172	0	0	1	0	1	0	2	148	81		2		42220	5.5	25.0	9.5	0.0	0.0	2200	50	0	300	148.0	81.0	35.5	83.0	**	**	99.0	137.0	78.0	37.6	112.0	**	**	96	136.0	65.0	37.0	92.0	**	**	**
103-096	4		2	64	58.3	155	1	0	0	0	0	1	3	180	76		3		41857	8.5	15	10	0	0	550	500	1990	0	180	76	36.200000000000003	78	171.19999999999999	33.299999999999997	100	124	76	35.299999999999997	83	124.8	38.100000000000001	100	76	52	36.299999999999997	81	**	**	99
103-110	4		2	77	58.6	156	1	0	0	0	0	1	3	145	70		3		41884	6.5	26	10	0	0	350	500	3150	350	145	70	35.899999999999999	73	271.80000000000001	33.600000000000001	100	130	84	37.100000000000001	79	**	**	100	135	82	37.799999999999997	78	**	**	**
104-034	4		2	72	62.9	149	0	1	0	0	0	0	2	144	63		2		42094	4.5	19.0	9	0.0	0.0	2000	50	0	300	144.0	63.0	36.5	95.0	224.7	32.7	97.0	139.0	65.0	37.2	105.0	105.6	43.7	97	168.0	90.0	37.6	112.0	**	**	**
103-060	4		2	55	61.4	169	0	0	0	0	0	0	2	146	49		2		41785	4	6	10	0	0	450	0	2250	250	146	49	36.200000000000003	97	**	**	99	149	85	35.799999999999997	86	**	**	99	139	82	36.299999999999997	88	**	**	**
103-105	4		2	52	65.7	154	0	0	0	0	0	0	2	106	59		1		41883	3.5	5	10	0	0	100	0	1100	150	106	59	35.299999999999997	80	**	**	100	101	65	36	87	**	**	100	123	87	38	88	**	**	**
104-066	4		2	37	37.7	149	0	0	0	1	0	0	2	106	68		1		42164	3.5	7.0	7	0.0	0.0	1200	100	0	150	124.0	58.0	35.6	114.0	**	**	100.0	110.0	66.0	35.7	86.0	**	**	97	103.0	72.0	37.0	72.0	**	**	**
104-107	4		2	49	53.1	160	0	0	0	0	0	0	2	134	68		1		42247	6.5	15.0	10	0.0	0.0	4000	1100	500	450	134.0	68.0	35.3	81.0	329.9	33.2	100.0	107.0	64.0	35.6	68.0	197	36.1	100	108.0	62.0	37.9	84.0	**	**	**
103-019	4		1	36	92.3	167	0	0	1	1	1	0	2	132	79		1		41703	6.1	12	8	0	0	100	0	4000	500	132	79	36.399999999999999	93	125	36.700000000000003	95	138	86	36	106	**	**	99	128	82	36.399999999999999	90	92.5	34.700000000000003	**
103-102	4		1	51	64.8	167.5	0	0	1	1	0	1	2	142	81		2		41883	6	8	9	0	0	200	0	2800	150	142	81	35.700000000000003	85	293.60000000000002	37.899999999999999	100	129	78	35.299999999999997	100	**	**	100	165	111	36.200000000000003	100	**	**	99
103-112	4		1	67	61.7	160.4	0	0	0	0	0	0	2	127	65		1		41885	4.75	12	9	0	0	50	0	2200	450	127	65	35.700000000000003	95	**	**	100	100	62	36.299999999999997	94	**	**	100	117	68	37	80	**	**	99
104-112	4		1	39	92.5	177	0	0	0	0	0	0	1	131	69		1		42255	4.25	12.0	10	0.0	0.0	1600	100	0	100	131.0	69.0	36.2	75.0	**	**	100.0	139.0	69.0	36.4	88.0	**	**	100	136.0	72.0	37.6	93.0	**	**	100
104-057	4		2	55	54.6	153	0	0	0	0	0	0	1	124	60		1		42130	3	18.0	7.5	0.0	0.0	700	30	0	200	124.0	60.0	36.2	83.0	**	**	100.0	116.0	59.0	36.4	87.0	**	**	97	96.0	56.0	36.9	88.0	**	**	**
104-098	4		2	69	57.8	162	0	1	1	0	0	0	2	151	72		2		42219	3.25	22.0	10	0.0	0.0	1250	20	0	450	151.0	72.0	35.9	58.0	4	30.7	100.0	145.0	71.0	37	74.0	**	**	95	130.0	73.0	36.9	61.0	**	**	98
[truncated: 50 more columns]
